# Supplementary material
Source: publisher figshare collection journal article supplement (https://sage.figshare.com/ndownloader/files/31566765)
Supplement: Supplementary file 1 [file 31566765]

1. Could you explain what this means? SHOW PHOTOS OF LAS NEGRITAS PULOY.
   1. Do you like what you see?
2. Could you explain what this means? SHOW PHOTOS OF LAS PALENQUERAS.
   1. Do you like what you see?
   2. Do you have children?
      1. YES- Would you allow your children to paint themselves like this?
      2. NO- If you had children, would you allow your children to paint themselves like this? Why/Why not?
   3. Would you paint yourself like this? Why/Why not?
3. Could you explain what this means? SHOW PHOTOS OF EL SON DE NEGRO.
   1. Why do you think they’re making these faces?
   2. What is your initial reaction to this?
   3. Do you think this is how Black people are?
4. Could you explain to me why you think people paint their bodies with black paint?
5. What do you think of this?
6. Why do you think that people of African descent paint their bodies to demonstrate that they are of African descent?
7. Do you think there is a difference between people of African descent who wear the paint and those they are pretending to be, those they are supposed to represent?
8. Do you think that the images represent Cartagena? Why/Why not?
9. Do you think that the images represent the neighborhood of Getsemaní? Why/Why not?
10. Do you feel personally represented by these images? Why/Why not?
11. The mural artists in Ciudad Mural were told that they had to create images representing Cartagena or Getsemaní. I am going to show you a photo of a mural and I would like you to tell me if you think it represents the neighborhood. Why/Why not? SHOW MURAL PHOTO
12. Do you think it is an accurate representation of Black women?
13. What do you think of this advertisement? SHOW BESO DE NEGRA PHOTO
